# Supplementary material for: Background Ionizing Radiation and the Risk of Childhood Cancer: A Census-Based Nationwide Cohort Study
Source: PubMed Central journal article supplement (PMC4455589; doi:10.1289/ehp.1408548), 2015-02-23
Supplement: ehp.1408548.s001.508.pdf [file ehp.1408548.s001.508.pdf]

**Supplemental Material**

**Background Ionizing Radiation and the Risk of Childhood Cancer:  
A Census-Based Nationwide Cohort Study**

Ben D. Spycher, Judith E. Lupatsch, Marcel Zwahlen, Martin Rössli, Felix Niggli, Michael A. Grotzer, Johannes Rischewski, Matthias Egger, and Claudia E. Kuehni for the Swiss Pediatric Oncology Group and the Swiss National Cohort Study Group

**Table S1.** Characteristics of cancer cases included in analyses.

| <b>Characteristics</b>                                                                          | <b>Included in time to event analysis<br/>N (%)</b> | <b>Total eligible<br/>N (%)</b> |
|-------------------------------------------------------------------------------------------------|-----------------------------------------------------|---------------------------------|
| <b>All cases</b>                                                                                | 1,782 (100.0)                                       | 3,502 (100.0)                   |
| <b>ICCC3 main diagnostic group</b>                                                              |                                                     |                                 |
| Leukemias, myeloproliferative diseases, and myelodysplastic diseases                            | 530 (29.7)                                          | 1,092 (31.2)                    |
| Lymphomas and reticuloendothelial neoplasms                                                     | 328 (18.4)                                          | 474 (13.5)                      |
| CNS and miscellaneous intracranial and intraspinal neoplasms                                    | 423 (23.7)                                          | 775 (22.1)                      |
| Neuroblastoma and other peripheral nervous cell tumors                                          | 34 (1.9)                                            | 220 (6.3)                       |
| Retinoblastoma                                                                                  | 21 (1.2)                                            | 95 (2.7)                        |
| Renal tumors                                                                                    | 55 (3.1)                                            | 175 (5.0)                       |
| Hepatic tumors                                                                                  | 14 (0.8)                                            | 40 (1.1)                        |
| Malignant bone tumors                                                                           | 127 (7.1)                                           | 176 (5.0)                       |
| Soft tissue and other extraosseous sarcomas                                                     | 123 (6.9)                                           | 237 (6.8)                       |
| Germ cell tumors, trophoblastic tumors, and neoplasms of gonads                                 | 48 (2.7)                                            | 98 (2.8)                        |
| Other malignant epithelial neoplasms and malignant melanomas or unspecified malignant neoplasms | 79 (4.4)                                            | 111 (3.2)                       |
| <b>Sex</b>                                                                                      |                                                     |                                 |
| Male                                                                                            | 993 (55.7)                                          | 1945 (55.5)                     |
| Female                                                                                          | 789 (44.3)                                          | 1557 (44.5)                     |
| <b>Median age in years (IQR)</b>                                                                | 10.0 (6.0, 13.2)                                    | 6.2 (2.7, 11.8)                 |

Abbreviations: ICCC3 International Classification of Childhood Cancers – 3<sup>rd</sup> Edition (Steliarova-Foucher et al. 2005), IQR interquartile range, CNS central nervous system.

**Table S2.** Association between childhood cancer and dose rate of external ionizing radiation among children with stable place of residence<sup>a</sup> before entry into Swiss National Cohort.

| Dose rate                     | Cases | IR <sup>b</sup> | HR (95% CI) <sup>c</sup> |
|-------------------------------|-------|-----------------|--------------------------|
| <b>All cancers</b>            |       |                 |                          |
| <100 nSv/h                    | 470   | 11.24           | 1.00 <sup>d</sup>        |
| 100 - <150 nSv/h              | 726   | 12.22           | 1.09 (0.97, 1.22)        |
| 150 - <200 nSv/h              | 89    | 13.94           | 1.24 (0.99, 1.56)        |
| ≥200 nSv/h                    | 26    | 20.33           | 1.82 (1.23, 2.70)        |
| <b>Leukemia</b>               |       |                 |                          |
| <100 nSv/h                    | 141   | 3.37            | 1.00 <sup>d</sup>        |
| 100 - <150 nSv/h              | 210   | 3.54            | 1.05 (0.84, 1.29)        |
| 150 - <200 nSv/h              | 22    | 3.45            | 1.03 (0.66, 1.61)        |
| ≥200 nSv/h                    | 9     | 7.04            | 2.13 (1.09, 4.18)        |
| <b>ALL</b>                    |       |                 |                          |
| <100 nSv/h                    | 112   | 2.68            | 1.00 <sup>d</sup>        |
| 100 - <150 nSv/h              | 169   | 2.85            | 1.06 (0.83, 1.34)        |
| 150 - <200 nSv/h              | 19    | 2.98            | 1.12 (0.69, 1.82)        |
| ≥200 nSv/h                    | 7     | 5.47            | 2.09 (0.98, 4.50)        |
| <b>Lymphoma</b>               |       |                 |                          |
| <100 nSv/h                    | 84    | 2.01            | 1.00 <sup>d</sup>        |
| 100 - <150 nSv/h              | 131   | 2.21            | 1.10 (0.84, 1.45)        |
| 150 - <200 nSv/h              | 14    | 2.19            | 1.09 (0.62, 1.92)        |
| ≥200 nSv/h                    | 3     | 2.35            | 1.15 (0.36, 3.65)        |
| <b>CNS tumors</b>             |       |                 |                          |
| <100 nSv/h                    | 111   | 2.65            | 1.00 <sup>d</sup>        |
| 100 - <150 nSv/h              | 185   | 3.11            | 1.17 (0.93, 1.49)        |
| 150 - <200 nSv/h              | 21    | 3.29            | 1.24 (0.78, 1.97)        |
| ≥200 nSv/h                    | 8     | 6.26            | 2.37 (1.16, 4.86)        |
| <b>Other malignant tumors</b> |       |                 |                          |
| <100 nSv/h                    | 134   | 3.20            | 1.00 <sup>d</sup>        |
| 100 - <150 nSv/h              | 200   | 3.37            | 1.05 (0.84, 1.31)        |
| 150 - <200 nSv/h              | 32    | 5.01            | 1.57 (1.07, 2.31)        |
| ≥200 nSv/h                    | 6     | 4.69            | 1.47 (0.65, 3.33)        |

Abbreviations: ALL acute lymphoblastic leukemia, CNS central nervous system, IR incidence rate, HR hazard ratio, CI confidence interval.

<sup>a</sup>Children with same residence 5 years before census or, if this information was lacking, lived in the same municipality at birth. <sup>b</sup>Incidence rates are per 100,000 person years at risk. <sup>c</sup>From Cox proportional hazard models adjusting for sex and birth year. <sup>d</sup>Reference category.

**Table S3.** Numbers of observations according to category of cumulative dose of external ionizing radiation and age in a nested cases-control sample of children from the Swiss National Cohort.

| Age (years)  | [0-2]<br>mSv | [2-4]<br>mSv | [4-6]<br>mSv | [6-8]<br>mSv | [8-10]<br>mSv | [10-12]<br>mSv | [12-14]<br>mSv | [14-16]<br>mSv | [16-18]<br>mSv | [18-20]<br>mSv | [20-22]<br>mSv | [22-24]<br>mSv | [24-26]<br>mSv | [26-28]<br>mSv | [28-30]<br>mSv | ≥30<br>mSv | Total  |
|--------------|--------------|--------------|--------------|--------------|---------------|----------------|----------------|----------------|----------------|----------------|----------------|----------------|----------------|----------------|----------------|------------|--------|
| <1           | 1411         | 0            | 0            | 0            | 0             | 0              | 0              | 0              | 0              | 0              | 0              | 0              | 0              | 0              | 0              | 0          | 1411   |
| 1            | 4461         | 377          | 3            | 0            | 0             | 0              | 0              | 0              | 0              | 0              | 0              | 0              | 0              | 0              | 0              | 0          | 4841   |
| 2            | 1937         | 6004         | 223          | 8            | 0             | 0              | 0              | 0              | 0              | 0              | 0              | 0              | 0              | 0              | 0              | 0          | 8172   |
| 3            | 10           | 8749         | 959          | 151          | 13            | 0              | 0              | 0              | 0              | 0              | 0              | 0              | 0              | 0              | 0              | 0          | 9882   |
| 4            | 0            | 3961         | 4455         | 458          | 93            | 12             | 1              | 0              | 0              | 0              | 0              | 0              | 0              | 0              | 0              | 0          | 8980   |
| 5            | 0            | 370          | 9147         | 981          | 409           | 74             | 12             | 3              | 0              | 0              | 0              | 0              | 0              | 0              | 0              | 0          | 10996  |
| 6            | 0            | 19           | 6220         | 3653         | 537           | 276            | 55             | 15             | 1              | 1              | 0              | 0              | 0              | 0              | 0              | 0          | 10777  |
| 7            | 0            | 2            | 1758         | 8208         | 1019          | 419            | 195            | 46             | 20             | 7              | 0              | 0              | 0              | 0              | 0              | 0          | 11674  |
| 8            | 0            | 1            | 130          | 7805         | 3096          | 563            | 348            | 164            | 38             | 17             | 8              | 0              | 1              | 0              | 0              | 0          | 12171  |
| 9            | 0            | 0            | 19           | 2885         | 5755          | 792            | 371            | 271            | 104            | 44             | 15             | 9              | 4              | 1              | 1              | 0          | 10271  |
| 10           | 0            | 0            | 8            | 609          | 8326          | 2943           | 630            | 367            | 304            | 100            | 43             | 24             | 15             | 1              | 0              | 3          | 13373  |
| 11           | 0            | 0            | 0            | 80           | 4988          | 6819           | 1097           | 496            | 360            | 235            | 104            | 48             | 16             | 12             | 3              | 6          | 14264  |
| 12           | 0            | 0            | 0            | 25           | 1988          | 8053           | 2724           | 635            | 351            | 324            | 225            | 75             | 41             | 17             | 8              | 9          | 14475  |
| 13           | 0            | 0            | 0            | 18           | 360           | 7562           | 6478           | 1189           | 617            | 366            | 330            | 212            | 69             | 32             | 20             | 33         | 17286  |
| 14           | 0            | 0            | 0            | 0            | 89            | 3407           | 7709           | 2799           | 728            | 423            | 314            | 286            | 162            | 58             | 38             | 38         | 16051  |
| 15           | 0            | 0            | 0            | 2            | 31            | 943            | 6628           | 4819           | 1048           | 518            | 306            | 272            | 222            | 115            | 55             | 82         | 15041  |
| <b>Total</b> | 7819         | 19483        | 22922        | 24883        | 26704         | 31863          | 26248          | 10804          | 3571           | 2035           | 1345           | 926            | 530            | 236            | 125            | 171        | 179665 |

**Table S4.** Summary of studies on childhood cancer and background gamma radiation using individual level data.

| Study                      | Design                    | Country       | Age (yrs) | Period diagnosed | No. Cases        | Type of radiation                           | Exposure assessment                                    | Exposure timing                        | ALL Dose rate: RR (95% CI)                                                                                                                                                          | ALL Cumulative dose: RR (95% CI)                                 |
|----------------------------|---------------------------|---------------|-----------|------------------|------------------|---------------------------------------------|--------------------------------------------------------|----------------------------------------|-------------------------------------------------------------------------------------------------------------------------------------------------------------------------------------|------------------------------------------------------------------|
| (Axelson et al. 2002)      | Case-control              | Sweden        | <20       | 1980-1989        | 312 <sup>a</sup> | Gamma radiation from building facades       | Residence in an alum shale concrete house <sup>b</sup> | Based on full residential history      | Ever in alum shale house vs. never <sup>b</sup><br>1.4 (CI 1.0, 2.0)                                                                                                                | Never: referent<br>Low: 1.3 (0.84, 2.1)<br>High: 1.5 (0.98, 2.3) |
| (UKCCS Investigators 2002) | Case-control              | Great Britain | <15       | 1991-1996        | 2,165            | Indoor terrestrial and cosmic <sup>c</sup>  | Measure-ments in children's homes                      | At diagnosis                           | <5650.3 µGy/y: Ref.<br>650.3–5798.5 µGy/y: 1.00 (0.72, 1.40)<br>798.5–5916.2 µGy/y: 1.20 (0.85, 1.68)<br>916.2–41045.3 µGy/y: 0.96 (0.67, 1.37)<br>≥1045.3 µGy/y: 0.93 (0.65, 1.33) |                                                                  |
| (Kendall et al. 2013)      | Record-based case-control | Great Britain | <15       | 1980-2006        | 27,447           | Indoor terrestrial and cosmic <sup>c</sup>  | Mean dose rates within county district                 | At birth                               |                                                                                                                                                                                     | 1.10 (1.02, 1.19) per mGy                                        |
| Present study              | Census-based cohort       | Switzerland   | <16       | 1990-2008        | 1,782            | Outdoor terrestrial and cosmic <sup>c</sup> | Geographic model                                       | At census 1990, updated at census 2000 | 1.23 (0.84, 1.81) per 100 nSv/h                                                                                                                                                     | 1.04 (1.00, 1.09) per mSv                                        |

Abbreviations: ALL acute lymphoblastic leukemia, CI confidence interval, RR relative risk, UKCCS UK Childhood Cancer Study.

<sup>a</sup>Includes only ALL cases. <sup>b</sup>Gamma-radiation dose rates are assumed to be 300 nSv/h inside alum shale concrete houses and 100 nSv/h inside other houses.

<sup>c</sup>Terrestrial gamma radiation and the directly ionizing component of cosmic radiation.

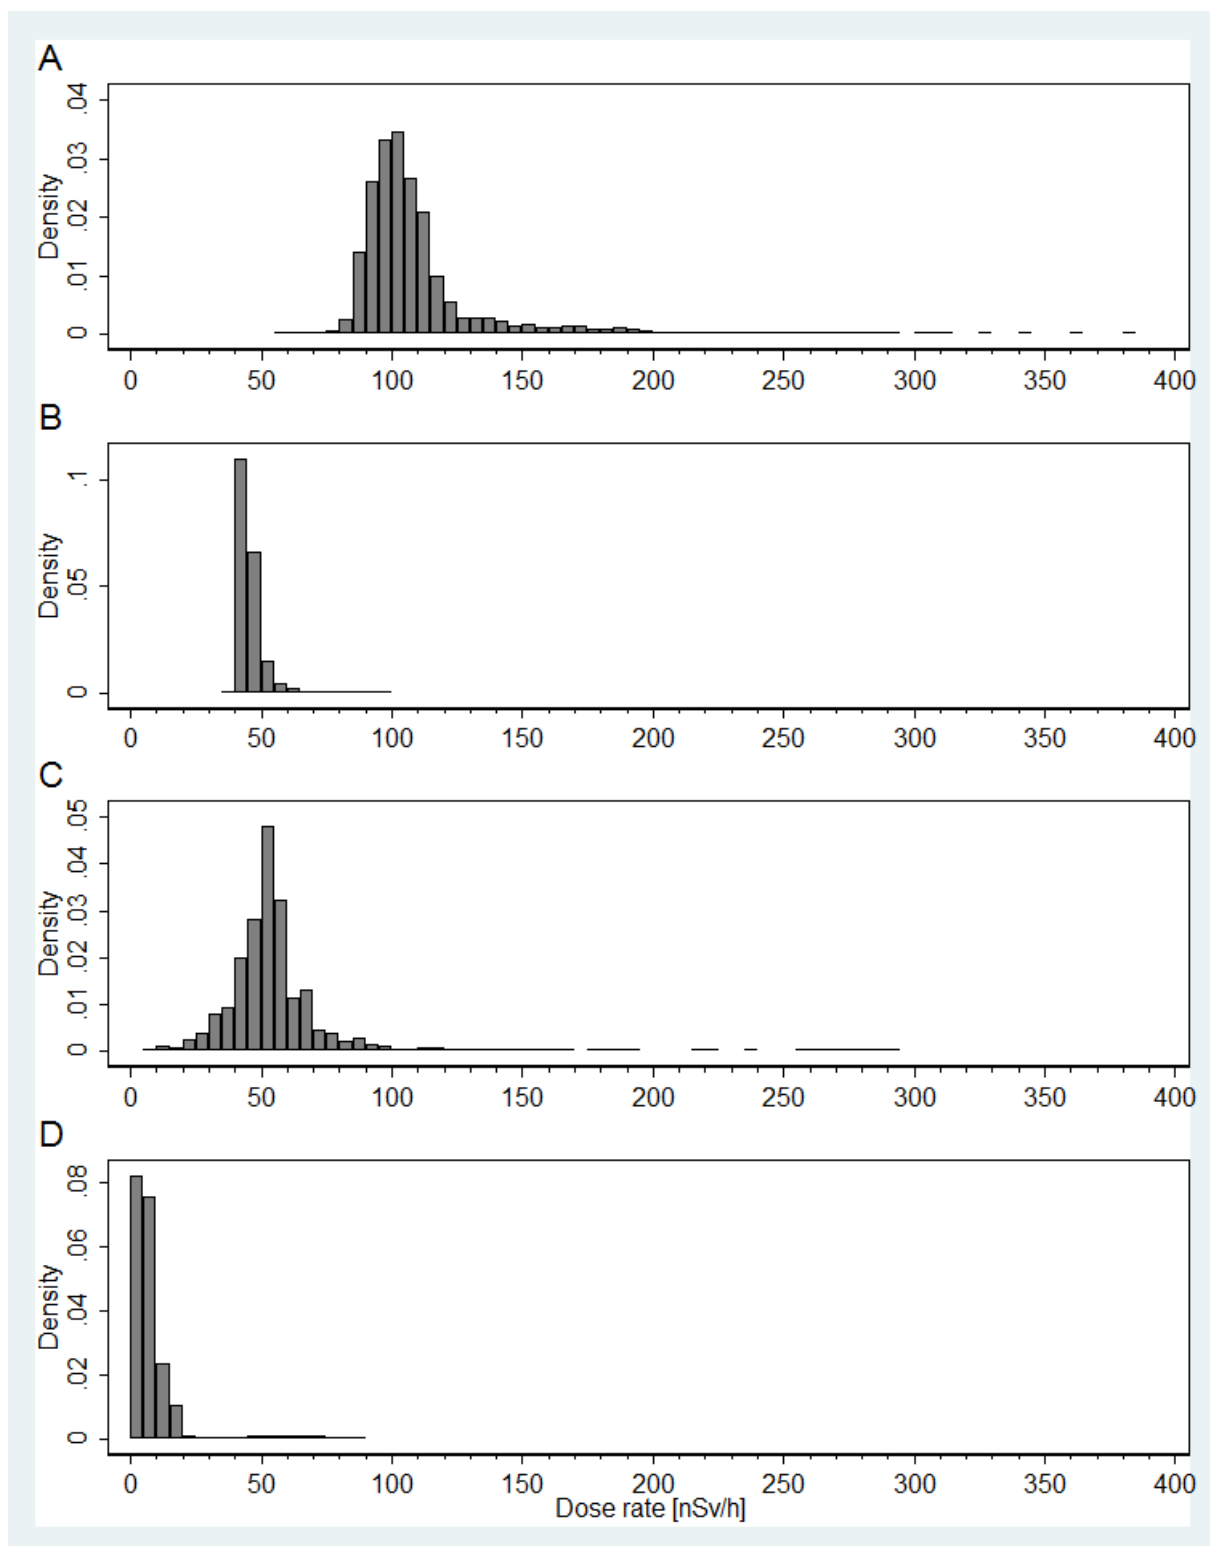

**Figure S1.** Distribution of dose rate from all sources (Total) (A), cosmic rays (B), natural terrestrial (C), and artificial terrestrial radiation (D) among children of the Swiss National Cohort.

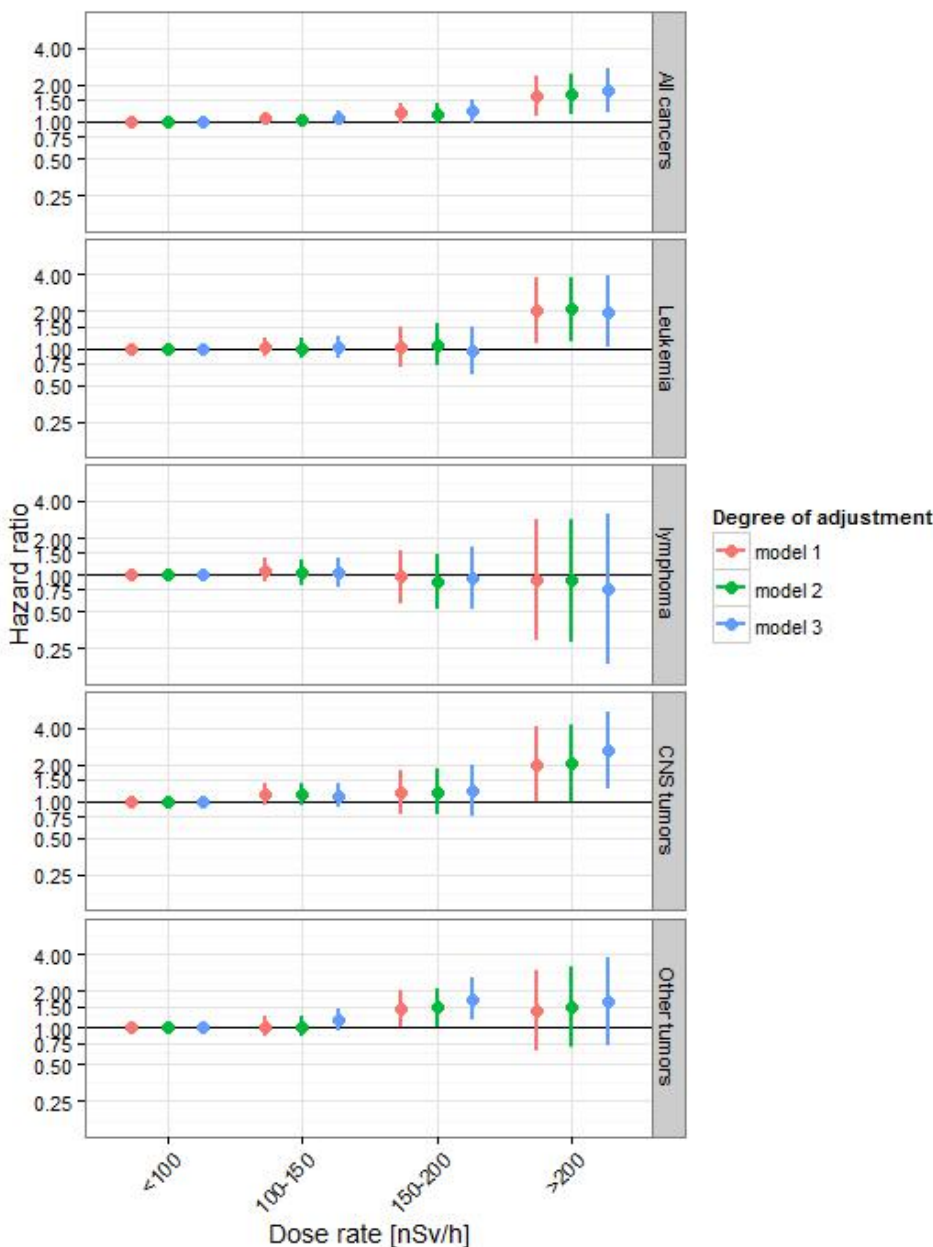

**Figure S2.** Effects on hazard ratios of adjusting for potential confounders. Results from Cox proportional hazards regression. Model 1: adjusting for sex and birth year. Model 2: additionally adjusting for distance to nearest highway, predicted field strength from broad cast transmitters based on a geographic model, distance to nearest high voltage power line, degree of urbanization of municipality, neighborhood socio-economic status (Panczak et al. 2012), education of household reference person and crowding. Model 3: adjusting for all the previous and for birth weight and birth order.

## References

- Axelsson O, Fredrikson M, Akerblom G, Hardell L. 2002. Leukemia in childhood and adolescence and exposure to ionizing radiation in homes built from uranium-containing alum shale concrete. *Epidemiology* 13:146-150.
- Kendall GM, Little MP, Wakeford R, Bunch KJ, Miles JC, Vincent TJ, et al. 2013. A record-based case-control study of natural background radiation and the incidence of childhood leukaemia and other cancers in Great Britain during 1980-2006. *Leukemia* 27:3-9.
- Panczak R, Galobardes B, Voorpostel M, Spoerri A, Zwahlen M, Egger M, et al. 2012. A Swiss neighbourhood index of socioeconomic position: development and association with mortality. *J Epidemiol Community Health* 66:1129-1136.
- Steliarova-Foucher E, Stiller C, Lacour B, Kaatsch P. 2005. International Classification of Childhood Cancer, third edition. *Cancer* 103:1457-1467.
- UKCCS Investigators. 2002. The United Kingdom Childhood Cancer Study (UKCCS) of exposure to domestic sources of ionising radiation: 2: gamma radiation. *Br J Cancer* 86:1727-1731.
